# Supplementary material for: Diversity of edible insects in a Natural World Heritage Site of India: entomophagy attitudes and implications for food security in the region
Source: PubMed Central journal article supplement (PMC7676356; doi:10.7717/peerj.10248), 2020-11-16
Supplement: peerj-08-10248-s002.pdf [file peerj-08-10248-s002.pdf]

## Questionnaire for Data Collection on Edible Insects in Manas National Park, Assam

**Project: Quantitative and Qualitative Survey of Edible Insects in various National Parks of Assam, India**  
**Session: 2018-2019**

This project has been approved by Office of the Principal Chief Conservator of Forests (Wildlife) and Chief Wildlife Warden, Government of Assam, India

Name of the interviewee: \_\_\_\_\_ Age: \_\_\_\_\_ Sex: \_\_\_\_\_  
 Address: Village \_\_\_\_\_ Revenue Block \_\_\_\_\_ District \_\_\_\_\_  
 Religion (Put ✓): Hinduism/Islam/Christian/Others      Caste: \_\_\_\_\_  
 Community (Put ✓): Rabha/Sarania/Adivashi/Bodo/Others

**Brief outline of edible insects:**

**Reason of eating:**

| Sl. No. | Species Name/<br>Local Name | Month of availability | Collection site(s)* | Edible parts** | Mode of eating*** | Medicinal value if any | Misc. |
|---------|-----------------------------|-----------------------|---------------------|----------------|-------------------|------------------------|-------|
| 1.      |                             |                       |                     |                |                   |                        |       |
| 2.      |                             |                       |                     |                |                   |                        |       |
| 3.      |                             |                       |                     |                |                   |                        |       |
| 4.      |                             |                       |                     |                |                   |                        |       |
| 5.      |                             |                       |                     |                |                   |                        |       |
| 6.      |                             |                       |                     |                |                   |                        |       |
| 7.      |                             |                       |                     |                |                   |                        |       |
| 8.      |                             |                       |                     |                |                   |                        |       |
| 9.      |                             |                       |                     |                |                   |                        |       |
| 10.     |                             |                       |                     |                |                   |                        |       |
| 11.     |                             |                       |                     |                |                   |                        |       |
| 12.     |                             |                       |                     |                |                   |                        |       |
| 13.     |                             |                       |                     |                |                   |                        |       |
| 14.     |                             |                       |                     |                |                   |                        |       |
| 15.     |                             |                       |                     |                |                   |                        |       |
| 16.     |                             |                       |                     |                |                   |                        |       |
| 17.     |                             |                       |                     |                |                   |                        |       |
| 18.     |                             |                       |                     |                |                   |                        |       |
| 19.     |                             |                       |                     |                |                   |                        |       |
| 20.     |                             |                       |                     |                |                   |                        |       |

\*Collection sites: Trees/Grasses/Crop field/forces/river/pond/swampy areas/backyard forest

\*\*Eidble parts: Whole bpdy/Larvae/Pupae/Eggs

\*\*\* Mode of eating: Fried/curry/smoked/raw/roasted/paste

Number of total members in the family: \_\_\_\_\_

|                |                    |                     |                |
|----------------|--------------------|---------------------|----------------|
| Above 60 years | Between 4-60 years | Between 20-40 years | Below 20 years |
|                |                    |                     |                |

Number of insect consumers in the family: \_\_\_\_\_

|                |                    |                     |                |
|----------------|--------------------|---------------------|----------------|
| Above 60 years | Between 4-60 years | Between 20-40 years | Below 20 years |
|                |                    |                     |                |

If collected for sale:

| Name of the market(s) | How frequently collected for sale (Put ✓) | Amount/quantity of insect selling (per month) | Site of collection | Price (in Rs.) |
|-----------------------|-------------------------------------------|-----------------------------------------------|--------------------|----------------|
|                       | Daily/weekly/monthly                      |                                               |                    |                |

Signature of Interviewee

Signature of Researcher
