# Supplementary material for: Diversity of edible insects in a Natural World Heritage Site of India: entomophagy attitudes and implications for food security in the region
Source: PeerJ. 2020 Nov 16;8:e10248. doi: 10.7717/peerj.10248 (PMC7676356; doi:10.7717/peerj.10248)
Supplement: Supplemental Information 1 — All the species diversity data, nutrient composition and entomophagy data. [file peerj-08-10248-s001.xlsx]

## Sheet: Abundance
Order	Species	AFH	Quadrate Occurrence	Abundance	FBH	Quadrate Occurrence	Abundance	OFH	Quadrate Occurrence	Abundance	Relative abundance
Orthoptera	Eupreponotus inflatus	44	27	1.63	0	0	0	0	0	0	5.82
Orthoptera	Mecopoda elongate	212	128	1.66	4	3	1.33	384	152	2.53	7.45
Orthoptera	Choroedocus robustus	67	39	1.72	20	9	2.22	41	11	3.73	8.92
Orthoptera	Heiroglyphus banian	31	21	1.48	78	13	6	72	24	3	8.75
Orthoptera	Gryllus bimculatus	12	9	1.33	44	11	4	5	4	1.25	4.22
Orthoptera	Acheta domestica	11	8	1.38	5	3	1.67	0	0	0	7.96
Orthoptera	Gryllotalpa africana	24	17	1.41	3	2	1.5	4	2	2	8.83
Orthoptera	Chondracris rosea	58	23	2.52	6	3	2	25	6	4.17	4.35
Hymenoptera	Vespa affinis	0	0	0	110	76	1.45	28	8	3.5	0.94
Hymenoptera	Polistis olivaceus	13	2	6.5	87	49	1.78	35	13	2.69	0.92
Hymenoptera	Apis indica	43	36	1.19	189	49	3.86	44	42	1.05	3.89
Hymenoptera	Apis dorsata	4	1	4	178	72	2.47	3	1	3	2.27
Hemiptera	Lethocerus indicus	2	1	2	7	7	1	88	46	1.91	0.71
Hemiptera	Laccotrephes ruber	112	45	2.49	28	21	1.33	74	60	1.23	1.96
Hemiptera	Diplonychus rusticus	212	67	3.16	56	29	1.93	184	89	2.07	5.23
Lepidoptera	Anthera assama	251	71	3.54	155	59	2.63	445	148	3.01	0.65
Lepidoptera	Philosamia ricini	988	56	17.64	24	11	2.18	76	44	1.73	1.59
Mantodea	Mantis religiosa	1256	206	6.1	8	7	1.14	40	27	1.48	2.76
Blattodea	Periplaneta americana	1205	212	5.68	0	0	0	73	32	2.28	0.98
Coleoptera	Orycetes rhinoceros	56	48	1.17	29	16	1.81	532	153	3.48	1.13
Isoptera	Microtermes obesi	41	8	5.13	79	45	1.76	1043	208	5.01	3.87
Odonota	Ictinogomphus rapax	1224	212	5.77	0	0	0	66	21	3.14	0.27

## Sheet: Nutrient composition
Common Name	Protein content (mg)	Lipid content (mg)			Carbohydrate content (mg)			Calcium			Magneisum			Essential amino acid content			Omega-3			Omega-6
	Mean	Mean		SD	Mean		SD
Giant Water Bugs	0.23412	0.133	±	4.07	0.059	±	4.39	0.15689	±	4.49	0.0788	±	1.62	0.15609	±	3.61	0.27334	±	3.1	0.18904	±	5.09
Termites	0.13859	0.18633	±	6.24	0.06525	±	6.56	0.21022	±	9.06	0.08505	±	6.19	0.10323	±	5.78	0.2653	±	5.27	0.2721	±	7.26
Mole Crickets	0.17823	0.065	±	3.92	0.078	±	4.24	0.08889	±	9.91	0.0978	±	7.04	0.23102	±	3.46	0.24101	±	2.95	0.24781	±	4.94
House Crickets	0.20587	0.069	±	3.11	0.043	±	3.43	0.09289	±	10.51	0.0628	±	7.64	0.02204	±	2.65	0.2301	±	2.14	0.2369	±	4.13
Grasshopper (large)	0.16254	0.07201	±	3.9	0.03502	±	4.22	0.0959	±	8.63	0.05482	±	5.76	0.1283	±	3.44	0.15321	±	2.93	0.16001	±	4.92
Grasshopper (brown)	0.23143	0.069	±	3.11	0.049	±	3.43	0.09289	±	10.47	0.0688	±	7.6	0.05902	±	2.65	0.09302	±	2.14	0.1982	±	4.13
Grasshopper (small)	0.19721	0.07033	±	3.19	0.04205	±	3.51	0.09422	±	10.51	0.06185	±	7.64	0.08465	±	2.73	0.12941	±	2.22	0.13621	±	4.21
Wasp (larvae)	0.15232	0.06833	±	7.02	0.091	±	7.34	0.09222	±	9.18	0.1108	±	6.31	0.1963	±	6.56	0.1123	±	6.05	0.2193	±	8.04
Water scavenger	0.27503	0.062	±	3.11	0.038	±	3.43	0.08589	±	10.69	0.0578	±	7.82	0.06501	±	2.65	0.15603	±	2.14	0.18812	±	4.13
Eri (Pupae)	0.19651	0.073	±	2.08	0.01803	±	2.4	0.09689	±	8.53	0.03783	±	5.66	0.25432	±	1.62	0.21631	±	1.11	0.18111	±	3.1
Water beetle	0.21231	0.072	±	5.04	0.035	±	5.36	0.09589	±	10.16	0.0548	±	7.29	0.15302	±	4.58	0.21897	±	4.07	0.2281	±	6.06
Cockroach	0.09851	0.073	±	5.66	0.065	±	5.98	0.09689	±	8.53	0.0848	±	5.66	0.2143	±	5.2	0.0543	±	4.69	0.21721	±	6.68
Eri (4th instar larvae)	0.14243	0.0461	±	2.71	0.03217	±	3.03	0.06999	±	8.05	0.05197	±	5.18	0.08321	±	2.25	0.09812	±	1.74	0.07492	±	3.73
Cockroach	0.1374	0.19204	±	0.56	0.0021	±	0.88	0.21593	±	8.05	0.0219	±	5.18	0.09832	±	0.1	0.03102	±	0.41	0.11312	±	1.58
Rhinoceros beetle	0.25431	0.02228	±	2.98	0.03567	±	3.3	0.04617	±	8.63	0.05547	±	5.76	0.21402	±	2.52	0.18132	±	2.01	0.185	±	4
Indian honey bee	0.19842	0.06833	±	2.49	0.076	±	2.81	0.09222	±	9.18	0.0958	±	6.31	0.13621	±	2.03	0.17431	±	1.52	0.16283	±	3.51
Dragonfly (large)	0.14536	0.0163	±	4.21	0.04535	±	4.53	0.04019	±	3.46	0.06515	±	0.59	0.1143	±	3.75	0.2213	±	3.24	0.22311	±	5.23
Crickets	0.13209	0.06833	±	2.44	0.0212	±	2.76	0.09222	±	9.18	0.041	±	6.31	0.19631	±	1.98	0.21041	±	1.47	0.22577	±	3.46
Praying Mantis	0.15672	0.035	±	3.21	0.06541	±	3.53	0.05889	±	7.54	0.08521	±	4.67	0.18231	±	2.75	0.06812	±	2.24	0.16102	±	4.23
Rock bee	0.10602	0.06833	±	5.77	0.09102	±	6.09	0.09222	±	9.18	0.11082	±	6.31	0.10274	±	5.31	0.10632	±	4.8	0.21032	±	6.79

## Sheet: Seasonal ava.
Species	Pre-monsoon	Monsoon	Retreating Monsoon	Winter	Total
Eupreponotus inflatus	35	64	16	24	139
Mecopoda elongate	3	13	47	57	120
Choroedocus robustus	225	344	420	51	1040
Heiroglyphus banian	29	130	16	12	187
Gryllus bimculatus	12	32	10	12	66
Acheta domestica	3	21	42	12	78
Gryllotalpa africana	15	125	96	24	260
Chondracris rosea	89	323	238	68	718
Vespa affinis	14	69	17	112	212
Polistis olivaceus	34	52	11	12	109
Apis indica	47	74	108	21	250
Apis dorsata	50	63	26	20	159
Lethocerus indicus	13	30	16	12	71
Laccotrephes ruber	9	109	72	16	206
Diplonychus rusticus	131	233	73	12	449
Anthera assama	443	221	105	56	825
Philosamia ricini	224	711	115	12	1062
Mantis religiosa	259	466	141	12	878
Periplaneta americana	153	798	176	125	1252
Orycetes rhinoceros	315	218	30	28	591
Microtermes obesi	402	511	160	64	1137
Ictinogomphus rapax	280	201	171	12	664
Total	2785	4808	2106	774

## Sheet: Indices
Index	AFH	FBH	SAH	OFH
Species Richness	24	22	6	23
Total individuals encountered	9213	1455	3435	6497
Simpson	0.1148	0.3871	0.2423	0.1467
Shannon-Wiener	2.822	2.153	1.329	2.392
Margalef	2.936	1.836	0.653	2.294

## Sheet: Taxonomy
Scientific Name	Order	Family	English name	Local name (Bodo)	Seasonal availability	Edible part	Mode of Eating
Eupreponotus inflatus	Orthoptera	Acrididae	Short-Horned Grasshopper	Gumanargi	May-Sept	Adult	Fried/smoked
Mecopoda elongate	Orthoptera	Tettigoniidae	Long horned grasshopper	Gumakhufri	May-Sept	Adult	Roasted/fried
Choroedocus robustus	Orthoptera	Acrididae	Short-Horned Grasshopper	Gumakhushep	June-Oct	Adult	Fried
Heiroglyphus banian	Orthoptera	Acrididae	Grasshopper	Gumagudul	June-Oct	Adult	Fried/Smoked
Gryllus bimculatus	Orthoptera	Gryllidae	Field Cricket	Fendadangra	May-Sept	Adult	Fried/Smoked
Acheta domestica	Orthoptera	Gryllidae	House Cricket	Gusengra	May-Sept	Adult	Fried/Smoked
Gryllotalpa africana	Orthoptera	Gryllotalpidae	Mole cricket	Sosroma	Whole Year	Adult	Fried/Smoked
Chondracris rosea	Orthoptera	Acrididae	Short horned Grasshopper	Gumanarenga	June-Aug	Adult	Fried
Vespa affinis	Hymenoptera	Vespidae	Potter wasp	Handilore bere	Apr- Sept	Eggs & Larvae	Raw/Roasted/Fried,
Polistis olivaceus	Hymenoptera	Vespidae	Paper wasp	Jothabere	Apr-Oct	Eggs &Larvae	Raw/Fried/Smoked
Apis indica	Hymenoptera	Apidae	Indian honey bee	Maoubere	May-Sept	Eggs & larvae	Raw
Apis dorsata	Hymenoptera	Apidae	Rock bee	Berema	May-Sept	Eggs & larvae	Raw
Lethocerus indicus	Hemiptera	Belostomatidae	Giant Water bug	Gangjema	Whole Year	Adult	Fried/Smoked
Laccotrephes ruber	Hemiptera	Nepidae	Water scorpion	Omabunda	Jun-Oct	Adult	Fried/Smoked
Diplonychus rusticus	Hemiptera	Belostomatidae	Water beetle	Amphu Dabla	May-Sept	Adult	Fried/Curry
Anthera assama	Lepidoptera	Saturnidae	Muga silkworm	Amphumuga	Apr-Sept	Larvae, Pupae	Fried
Philosamia ricini	Lepidoptera	Saturnidae	Eri silkworm	Amphoulata	Apr-Sept	Larvae, Pupae	Fried
Mantis religiosa	Mantodea	Mantidae	Praying mantis	Gumagangu	June-Nov	Adult	Fried/Smoked
Periplaneta americana	Blattodea	Blattellidae	Cockroach	Thaoamphow	Whole year	Adult	Fried
Orycetes rhinoceros	Coleoptera	Scarabaeidae	Rhinoceros beetle	Jeljer	Sept-Feb	Larvae (Grubs)	Fried
Microtermes obesi	Isoptera	Termitidae	Termite	Wuri	Mar-July	Larvae, Adult	Fried
Ictinogomphus rapax	Odonota	Gomphidae	Dragon fly	Gandula	Mar-Aug	Nymph	Fried

## Sheet: Responses
Tribes	Respondents	Positive response	% of consumption
Bodo	220	200	0.978
Adivashi	250	201	0.804
Rabha	200	192	0.96
Sarania	200	157	0.785
Non-tribal	150	23	0.153
Reason of eating	No of Respondents
Delicious & tasty	1146
Seasoning food item	199
Traditional medicinal food	29
Cultural food of a Tribe	87
Easily available food	121
Inexpensive food	333
No reason	27
Mode of eating	Percentage of respondents (%)
Roasted	25
Smoked	27
Dish ingredient	15
Fried	45
Raw	8
Curry	19
Age group	Number of insect consumers	% of age group consumers
> 60 years	498	99.17
Between 40 - 60 years	786	97.71
Between 20 - 40 years	1049	83.13
< 20 years	342	56.67
Total	2675
